# Supplementary material for: Leveraging Large Language Models to Construct Feedback from Medical Multiple-Choice Questions
Source: Research Square preprint supplement (doi:10.21203/rs.3.rs-4706589/v1), 2024-08-01

---

## Supplementary material

**Article Title: Providing Feedback to medical students via Large Language Models**

**Journal Name: Advances in Health Science Education**

---

Mihaela Tomova  
Technische Universität Ilmenau, 98693 Ilmenau, Germany  
E-mail: mihaela-todorova.tomova@tu-ilmenau.de

Iván Roselló Atanet  
Charité - Universitätsmedizin Berlin, corporate member of Freie Universität Berlin and Humboldt Universität zu Berlin,  
AG Progress Test Medizin, Charité- platz 1, 10117 Berlin, Germany.

Victoria Sehy  
Charité - Universitätsmedizin Berlin, corporate member of Freie Universität Berlin and Humboldt Universität zu Berlin,  
AG Progress Test Medizin, Charité- platz 1, 10117 Berlin, Germany.

Miriam Sieg  
Charité - Universitätsmedizin Berlin, corporate member of Freie Universität Berlin and Humboldt Universität zu Berlin,  
AG Progress Test Medizin, Charité- platz 1, 10117 Berlin, Germany.

Maren März  
Charité - Universitätsmedizin Berlin, corporate member of Freie Universität Berlin and Humboldt Universität zu Berlin,  
AG Progress Test Medizin, Charité- platz 1, 10117 Berlin, Germany.

Patrick Mäder  
Technische Universität Ilmenau, 98693 Ilmenau, Germany  
Faculty of Biological Sciences, Friedrich Schiller University, 07745 Jena, Germany

# 1 Survey questions assessing the generated LLM responses and the LLM's usefulness and usability for generating content-based feedback from medical multiple-choice questions

Sie haben 0 von 18 PTM-Fragen ausgewertet.

## PTM-Frage

1. Eine 40-jährige Frau stellt sich mit plötzlich einsetzendem starken Brustschmerz vor, der in den Rücken ausstrahlt. Sie beschreibt den Schmerz als reißend. Bei der Untersuchung zeigt sich ein deutlich unterschiedlicher Blutdruck zwischen ihren Armen, wobei ein Arm einen deutlich niedrigeren Druck aufweist. Was ist die wahrscheinlichste Diagnose? Die Antwort ist Aortendissektion.

## Themen & Unterthemen ⓘ

### Methode 1

#### 1. Aortendissektion

- Akuter Brustschmerz
- Rückenschmerzen
- Unterschiedlicher Blutdruck zwischen den Armen

#### 2. Diagnose

- Klinische Untersuchung
- Beschreibung des Schmerzes (reißend)
- Erfassung der Krankengeschichte

#### 3. Differentialdiagnose

- Mögliche Ursachen für akuten Brustschmerz
- Ausschluss anderer Erkrankungen
- Herzinfarkt

### Methode 2

#### 1. Aortendissektion

- Diagnose
- Symptome (plötzlicher starker Brustschmerz, Ausstrahlung in den Rücken, reißender Schmerz)
- Unterschiedlicher Blutdruck zwischen den Armen

#### 2. Brustschmerz

- Plötzlicher Beginn
- Schmerzcharakteristik (reißend, ausstrahlend)
- Differenzialdiagnosen bei Brustschmerz

#### 3. Unterschiedlicher Blutdruck zwischen den Armen

- Bedeutung in der Diagnostik
- Assoziierte Erkrankungen (Aortendissektion, vaskuläre Erkrankungen)
- Messmethoden und Interpretation

**Fig. 1** An example of a PTM question <sup>2</sup>and generated content-based feedback by Bing Chat (Method 1) and ChatGPT 4.0 (Method 2).

<sup>2</sup> The example question is generated by AI due to copyright reasons of the original PTM questions

**Bitte beantworten Sie die folgenden Umfragefragen.**

Der Knopf 'Absenden' befindet sich unten auf der Seite! Es gibt keinen Zurück-Knopf! Eingereichte Antworten können nicht geändert werden!

1. Wie relevant empfinden Sie die **Themen**, die durch Methode 1 und Methode 2 zu den Inhalten der gegebenen Texte (PTM-Frage) gehören? Bewerten Sie die Relevanz auf einer Skala von 1 (= keine relevante Themen) bis 5 (= alle Themen relevant). Die Relevanz steht in Verbindung damit, wie präzise die extrahierten Themen wichtige Konzepte aus der PTM-Frage erfassen. **Das Sprachmodell sollte maximal drei Themen extrahieren.**

**Methode 1**

- ☐ 1 (keine relevante Themen)
- ☐ 2
- ☐ 3 (einige relevante Themen, aber es gibt bessere)
- ☐ 4
- ☐ 5 (alle Themen relevant)

**Methode 2**

- ☐ 1 (keine relevante Themen)
- ☐ 2
- ☐ 3 (einige relevante Themen, aber es gibt bessere)
- ☐ 4
- ☐ 5 (alle Themen relevant)

2. Bewerten Sie die Brauchbarkeit der für jedes Thema generierten **Unterthemen** auf einer Skala von 1 (= keines nützlich) bis 5 (= alle nützlich). Sind sie eine sinnvolle Ergänzung und Beschreibung des Hauptthemas?

**Unterthemen** in **Methode 1**

- ☐ 1 (keines nützlich) | ☐ 2 | ☐ 3 | ☐ 4 | ☐ 5 (alle nützlich) |

**Unterthemen** in **Methode 2**

- ☐ 1 (keines nützlich) | ☐ 2 | ☐ 3 | ☐ 4 | ☐ 5 (alle nützlich) |

3. Unter Berücksichtigung sowohl der extrahierten **Themen** als auch der vorgeschlagenen **Unterthemen**, welche Methode bevorzugen Sie insgesamt?

- ☐ **Methode 1** | ☐ **Methode 2** | ☐ Beide sind gleichermaßen gut. | ☐ Keine von beiden |

**Absenden**

**Fig. 2** Survey questions about the assessment of the generated LLM responses.

1. Würden Sie ein Sprachmodell zur Extrahierung von Schlüsselinformationen von Prüfungsinhalten nutzen, nachdem Sie die Ergebnisse gesehen haben?

- ☐ auf keinen Fall    ☐ vielleicht punktuell    ☐ auf jeden Fall

2. Wie wichtig ist das Review der Ergebnisse?

- ☐ Kann ich nicht einschätzen  
☐ Sehr wichtig, die Themen und Unterthemen haben zu selten gepasst  
☐ Sehr wichtig, obwohl die Themen und Unterthemen gepasst haben  
☐ Stichpunktartig, denn die Themen und Unterthemen haben gut gepasst  
☐ Eigentlich sind die Ergebnisse so gut, dass eine Review nur selten bis gar nicht erfolgen muss

3. Sind sie Mediziner?

- ☐ Ja    ☐ Nein

4. (Optional) Haben Sie Anmerkungen bezüglich der Verwendung von Sprachmodelle zur Bereitstellung von inhaltlich basiertem Feedback an Studierende, das aus Prüfungsfragen abgeleitet wurde?

Comment 1

Absenden

**Fig. 3** Survey questions about the background of the participants and their general perception of the LLMs.

## 2 Wordclouds generated from subtopics per domain (in German)

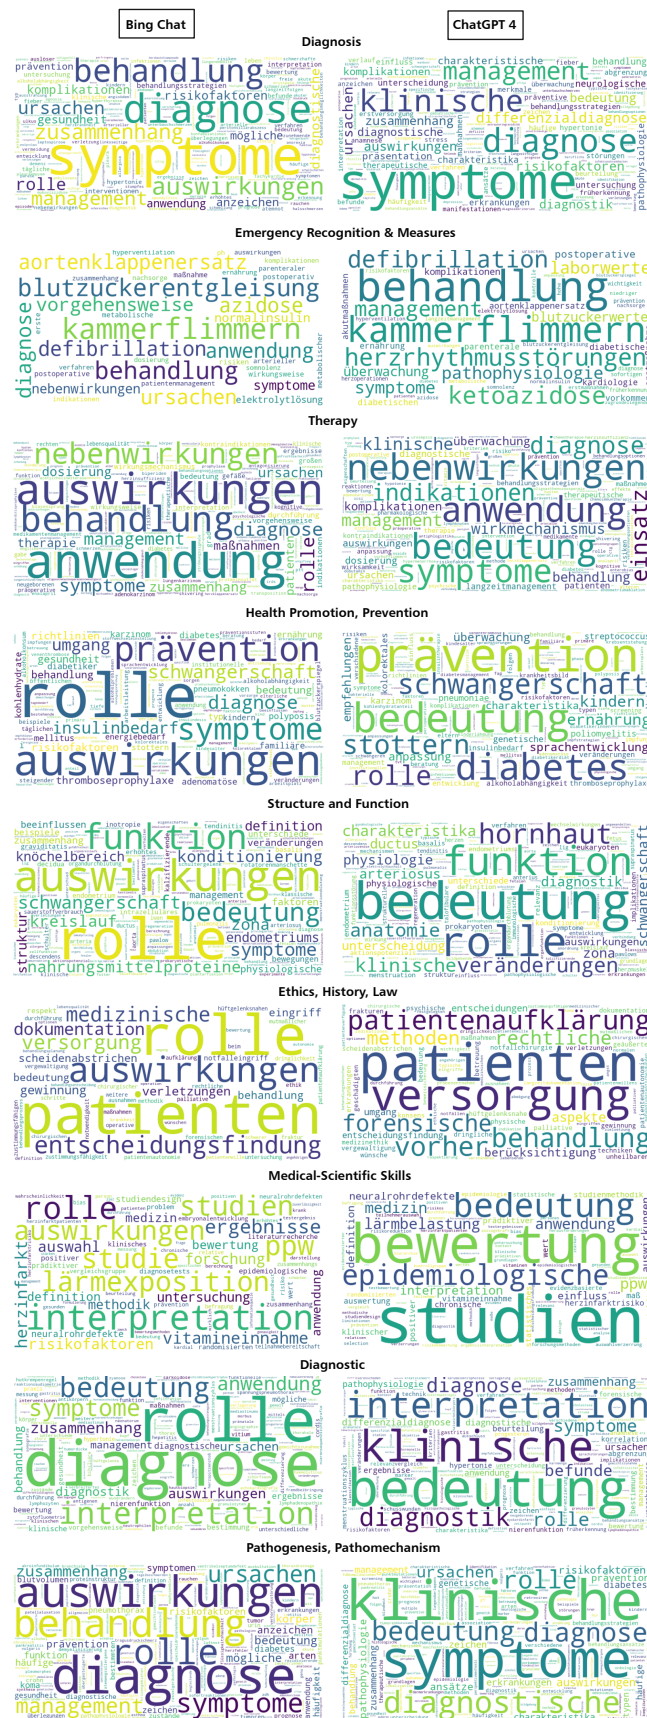

Supplement: Supplementary file 1 [file 525a9951f243e5e9577b1ea9.pdf]
